# Supplementary material
Source: PubMed Central journal article supplement (PMC4928632)
Supplement: NIHMS789637-supplement-Supplemental_Material.pdf [file NIHMS789637-supplement-Supplemental_Material.pdf]

## **SUPPLEMENTAL MATERIAL**

**Supplemental Table 1.** Comparison of All- Cause and Heart Failure-Specific 30-Day Readmission Rates in 2009 and 2012

**Supplemental Table 2.** Site level Characteristics by Center Percentage of Referrals to Heart Failure Readmission Rates Above and Below Median Referral Rate

**Supplemental Table 3.** Association of Site-Level Factors and General Risk-Adjusted 30-Day Readmission Rates in 2012

**Supplemental Table 1.** Comparison of 30-Day All-Cause and Heart Failure Readmission Rates in 2009 and 2012

| Variable                                                 | Mean Rate (SD) |
|----------------------------------------------------------|----------------|
| Unadjusted 30-day all-cause readmission rate in 2009     | 20.2 (7.5)     |
| Unadjusted 30-day all-cause readmission rate in 2012     | 18.6 (6.5)     |
| Unadjusted 30-day heart failure readmission rate in 2009 | 7.2 (4.1)      |
| Unadjusted 30-day heart failure readmission rate in 2012 | 6.5 (3.8)      |

**Supplemental Table 2. Hospital-Level Characteristics by Percentage of Referrals to Heart Failure Disease Management Programs**

| Variable                                                 | All Hospitals<br>(N = 70) | Below the Median<br>Referral Rate<br>(n = 35)* | Above the Median<br>Referral Rate<br>(n = 35)* | P<br>Value |
|----------------------------------------------------------|---------------------------|------------------------------------------------|------------------------------------------------|------------|
| Demographic characteristics, median (quartiles)          |                           |                                                |                                                |            |
| Average age, y                                           | 80.0 (78.2 to 81.7)       | 81.3 (79.0 to 82.8)                            | 79.2 (77.5 to 80.8)                            | .002       |
| Women, %                                                 | 53.6 (50.2 to 57.8)       | 57.2 (49.9 to 65)                              | 52.2 (50.2 to 55.9)                            | .10        |
| Race other than white, %                                 | 14.6 (6.5 to 31.3)        | 1.4 (3.9 to 27.1)                              | 20.1 (10.1 to 35.7)                            | .01        |
| Insurance, %                                             |                           |                                                |                                                |            |
| Medicaid                                                 | 3.0 (0.3 to 8.3)          | 0.5 (0.0 to 6.7)                               | 6.6 (1.5 to 9.4)                               | .003       |
| Medicare                                                 | 83.1 (43.3 to 97.2)       | 89.7 (5.9 to 98.4)                             | 77.8 (33.3 to 89.3)                            | .02        |
| Other                                                    | 13.0 (1.8 to 36.5)        | 5.4 (0.8 to 35.6)                              | 13.9 (4.1 to 43.5)                             | .07        |
| None or not documented                                   | 0.0 (0.0 to 0.2)          | 0                                              | 0.0 (0.0 to 0.3)                               | .03        |
| Medical history, median (quartiles)                      |                           |                                                |                                                |            |
| Anemia, %                                                | 19.3 (14.3 to 26.0)       | 18.7 (12.4 to 27.7)                            | 20.0 (14.8 to 25.5)                            | .79        |
| Atrial fibrillation, %                                   | 40.0 (32.6 to 44.9)       | 39.6 (32.0 to 44.4)                            | 40.2 (32.6 to 45.7)                            | .61        |
| Cerebrovascular accident or transient ischemic attack, % | 16.8 (13.3 to 19.6)       | 16.6 (11.1 to 19.3)                            | 16.8 (13.9 to 19.8)                            | .22        |
| Chronic obstructive pulmonary disease, %                 | 29.2 (24.1 to 34.2)       | 28.4 (23.3 to 33.3)                            | 30.7 (24.8 to 35.0)                            | .11        |
| Depression, %                                            | 10.0 (5.8 to 13.1)        | 1.1 (6.1 to 13.1)                              | 9.7 (5.4 to 15.0)                              | .83        |
| Dialysis, %                                              | 2.7 (1.6 to 4.0)          | 2.4 (0.8 to 4.4)                               | 2.7 (2.3 to 3.9)                               | .23        |
| Hyperlipidemia, %                                        | 51.5 (44.1 to 58.3)       | 48.7 (39.4 to 52.8)                            | 56.7 (47.2 to 60.9)                            | .01        |
| Hypertension, %                                          | 78.5 (72.9 to 83.8)       | 77.5 (73.9 to 82.8)                            | 79.5 (72.2 to 85.4)                            | .25        |
| Ischemic history, %                                      | 58.8 (50.9 to 63.5)       | 54.6 (5.4 to 63.1)                             | 59.7 (54.8 to 64.6)                            | .11        |
| Peripheral vascular disease, %                           | 12.7 (8.3 to 16.9)        | 12.4 (6.4 to 16.2)                             | 13.3 (9.7 to 17.5)                             | .16        |
| Renal insufficiency, %                                   | 19.5 (11.6 to 26.8)       | 16.9 (1.2 to 23.9)                             | 22.9 (12.9 to 27.8)                            | .04        |
| Smoking, %                                               | 10.1 (5.5 to 12.8)        | 8.8 (5.4 to 12.3)                              | 10.9 (7.6 to 13.5)                             | .06        |
| Vital signs at admission, median (quartiles)             |                           |                                                |                                                |            |
| Average respiratory rate, bpm                            | 20.8 (20.2 to 22.1)       | 2.8 (2.2 to 22.8)                              | 20.8 (20.0 to 21.7)                            | .19        |
| Average weight, kg                                       | 80.7 (77.1 to 82.8)       | 79.7 (74.2 to 82.2)                            | 81.2 (78.6 to 83.7)                            | .08        |
| Systolic blood pressure, mm Hg                           | 141.6 (138.0 to 146.0)    | 142.9 (138.9 to 146.0)                         | 140.4 (137.5 to 146.1)                         | .33        |
| Admission laboratory test results, median (quartiles)    |                           |                                                |                                                |            |
| Average blood urea nitrogen, mg/dL                       | 29.7 (28.7 to 31.6)       | 29.4 (28.1 to 31.7)                            | 30.3 (29.1 to 31.5)                            | .33        |
| Average B-type natriuretic peptide, pg/mL                | 1216.6 (1017.1 to 1573.4) | 123.2 (1050 to 189.7)                          | 1196.8 (1016.7 to 1491.5)                      | .47        |
| Average ejection fraction, %                             | 43.8 (41.2 to 46.6)       | 45.2 (42.1 to 47.0)                            | 42.4 (40.6 to 44.9)                            | .03        |
| Average hemoglobin, g/dL                                 | 11.7 (11.5 to 12.0)       | 11.8 (11.7 to 12.1)                            | 11.7 (11.4 to 11.9)                            | .02        |
| Average serum creatinine, mg/dL                          | 1.6 (1.5 to 1.7)          | 1.6 (1.4 to 1.7)                               | 1.6 (1.6 to 1.8)                               | .04        |
| Average sodium, mEq/L                                    | 137.4 (136.8 to 137.9)    | 137.3 (136.7 to 137.9)                         | 137.5 (136.9 to 138.0)                         | .70        |
| Average troponin, ng/dL                                  | 0.2 (0.1 to 0.4)          | 0.17 (0.1 to 0.4)                              | 0.2 (0.2 to 0.4)                               | .53        |
| Discharge laboratory test results, median (quartiles)    |                           |                                                |                                                |            |
| Average potassium, mEq/L                                 | 4.1 (4.0 to 4.1)          | 4.1 (4.0 to 4.2)                               | 4.1 (4.0 to 4.1)                               | .64        |
| Average serum creatinine, mg/dL                          | 1.7 (1.5 to 1.8)          | 1.6 (1.4 to 1.7)                               | 1.7 (1.5 to 1.9)                               | .06        |
| Average sodium, mEq/L                                    | 137.6 (137.0 to 138.2)    | 137.7 (137.4 to 138.3)                         | 137.4 (136.7 to 138.2)                         | .10        |
| Average weight difference from admission, kg             | 2.5 (1.6 to 2.9)          | 2.4 (1.0 to 2.7)                               | 2.5 (1.8 to 3.1)                               | .27        |
| Hospital characteristics, median (quartiles)             |                           |                                                |                                                |            |

|                                                                                      |                     |                      |                      |        |
|--------------------------------------------------------------------------------------|---------------------|----------------------|----------------------|--------|
| Patients referred to heart failure disease management program, median (quartiles), % | 5.4 (0.0 to 16.0)   | 0.0 (0.0 to 0.9)     | 16.0 (9.7 to 37.5)   | < .001 |
| Patients with discharge instructions completed, median (quartiles), %                | 95.8 (90.5 to 98.1) | 94.1 (9.5 to 97.3)   | 96.8 (91.7 to 98.6)  | .24    |
| Patients with LVSD receiving $\beta$ -blockers, median (quartiles), %                | 97.6 (95.0 to 99.0) | 97.7 (94.4 to 100.0) | 97.4 (95.0 to 98.9)  | .60    |
| Patients with LVSD receiving ACE inhibitor/ARB, median (quartiles), %                | 96.2 (92.5 to 98.9) | 97.3 (93.3 to 100.0) | 95.9 (92.5 to 98.8)  | .30    |
| Length of stay, median (quartiles), d                                                | 4 (4 to 5)          | 4 (4 to 4)           | 4 (4 to 5)           | .02    |
| Teaching hospital, %                                                                 | 67.1                | 51.4                 | 82.7                 | .006   |
| Presence of cardiac intensive care unit, %                                           | 74.6                | 65.5                 | 82.4                 | .13    |
| Adult diagnostic or interventional catheterization, %                                | 88.9                | 79.3                 | 97.1                 | .03    |
| Heart transplant services, %                                                         | 15.9                | 3.5                  | 26.5                 | .01    |
| Beds, median (quartiles)                                                             | 370 (217 to 555)    | 280 (168 to 408)     | 475 (340 to 616)     | < .001 |
| Annual Medicare discharges, median (quartiles)                                       | 6534 (4534 to 9341) | 4966 (2916 to 8296)  | 7930 (5930 to 11314) | .01    |
| Annual Medicaid discharges, median (quartiles)                                       | 2715 (1281 to 4837) | 2111 (1009 to 3284)  | 4130 (2343 to 6975)  | .002   |
| US geographic region, No. (%)                                                        |                     |                      |                      | .01    |
| Midwest                                                                              | 15 (21.4)           | 2 (5.7)              | 13 (37.1)            |        |
| Northeast                                                                            | 19 (27.1)           | 12 (34.3)            | 7 (20.0)             |        |
| South                                                                                | 23 (32.9)           | 12 (34.3)            | 11 (31.4)            |        |
| West                                                                                 | 13 (18.6)           | 9 (25.7)             | 4 (11.4)             |        |
| Rural location, %                                                                    | 4.3                 | 8.6                  | 0                    | .08    |
| Cardiologists per 100,000 residents                                                  | 5.7 (4.8 to 7.7)    | 5.1 (4.3 to 5.7)     | 7.0 (5.7 to 7.9)     | .004   |
| Rate of leg amputation                                                               | 0.6 (0.5 to 0.8)    | 0.6 (0.5 to 0.7)     | 0.6 (0.5 to 0.8)     | .69    |
| Discharges for ambulatory care-sensitive conditions per 1000 beneficiaries           | 56.7 (46.8 to 65.5) | 53.2 (41.5 to 65.6)  | 57.8 (49.8 to 63.9)  | .50    |
| Patients filling $\beta$ -blocker prescription in 1-6 months, %                      | 84.0 (80.6 to 88.4) | 83.8 (79.1 to 88.0)  | 84.3 (80.7 to 88.8)  | .57    |
| Patients filling $\beta$ -blocker prescription in 7-12 months, %                     | 79.2 (73.3 to 82.6) | 79.3 (73.1 to 83.3)  | 77.6 (73.4 to 82.1)  | .51    |
| Patients filling ACE inhibitor/ARB prescription, %                                   | 74.3 (72.6 to 76.4) | 74.0 (72.6 to 76.5)  | 74.8 (72.9 to 76.3)  | .49    |
| 30-day risk-adjusted readmission rate in 2009                                        | 19.9 (19.3 to 20.7) | 20.0 (19.4 to 20.8)  | 19.6 (19.1 to 20.6)  | .22    |
| 30-day risk-adjusted readmission rate in 2012                                        | 18.8 (18.2 to 19.6) | 19.1 (18.6 to 20.1)  | 18.4 (17.9 to 19.4)  |        |
| Relative change in 30-day readmission rate, %                                        | -5.6 (-8.7 to 0.9)  | -4.23 (-7.9 to 1.0)  | -6.55 (-11.5 to 0.2) | .25    |

Abbreviations: ACE, angiotensin-converting enzyme; ARB, angiotensin II receptor blocker; LVSD, left ventricular systolic dysfunction.

\* The median rate of referral to a heart failure disease management program was 5.35%.

† Not all sites had data for every variable.

**Supplemental Table 3.** Association of Site-Level Factors and General Risk-Adjusted 30-Day Readmission Rates in 2012\*

| Site Factor                                                              | Estimate (95% CI)      | <i>P</i> Value | Global <i>P</i> Value |
|--------------------------------------------------------------------------|------------------------|----------------|-----------------------|
| Percent ACE inhibitor/ARB for patients with LVSD                         | -0.07 (-0.14 to 0.00)  | .05            |                       |
| Percent discharge instructions completed                                 | 0.05 (-0.02 to 0.11)   | .15            |                       |
| Percent of patients referred to heart failure disease management program | -0.02 (-0.03 to -0.00) | .04            |                       |
| Region: Midwest vs Northeast                                             | -0.73 (-1.55 to 0.09)  | .08            | .02                   |
| Region: South vs Northeast                                               | -0.65 (-1.37 to 0.06)  | .07            |                       |
| Region: West vs Northeast                                                | -1.37 (-2.20 to -0.53) | .002           |                       |

Abbreviations: ACE, angiotensin-converting enzyme; ARB, angiotensin II receptor blocker; LVSD, left ventricular systolic dysfunction.

\* Variables listed were chosen based on forward selection to be included in multivariable linear regression model. Each hospital site's general risk-adjusted 30-day readmission rate was used as the dependent variable in the model. Global *P* value presented for overall region variable.
